# Supplementary material for: Identification and Bioinformatics Analysis of Differentially Expressed Milk Exosomal Micrornas in Milk Exosomes of Heat-Stressed Holstein Cows
Source: Research Square preprint supplement (doi:10.21203/rs.3.rs-593653/v1), 2021-06-16
Supplement: Supplementary file 1 [file 5af2f1e0c0052c2408241f65.xlsx]

## Sheet: Sheet1
Table S7. KEGG pathway enrichment results
S gene number is the number of genes annotated as significantly different for a specific GO;TS gene number is the number of genes with significant differences;B gene number is the number of genes in a specific GO.TB gene number is the total number of genes
Pathway Id	pathway description	S gene number	TS gene number	B gene number	TB gene number	Pvalue of Fisher's Exact Test
ko04010	MAPK signaling pathway	245	4929	287	7718	1.27775e-16
ko04144	Endocytosis	198	4929	237	7718	9.44339e-12
ko05166	Human T-cell leukemia virus 1 infection	183	4929	220	7718	1.26451e-10
ko04015	Rap1 signaling pathway	168	4929	201	7718	3.4411e-10
ko05323	Rheumatoid arthritis	85	4929	93	7718	8.19802e-10
ko04659	Th17 cell differentiation	96	4929	108	7718	2.88053e-09
ko05205	Proteoglycans in cancer	157	4929	191	7718	1.48252e-08
ko05200	Pathways in cancer	384	4929	512	7718	1.69918e-08
ko04146	Peroxisome	73	4929	82	7718	2.09561e-07
ko04145	Phagosome	129	4929	158	7718	6.23196e-07
ko04218	Cellular senescence	126	4929	154	7718	6.71195e-07
ko04070	Phosphatidylinositol signaling system	82	4929	95	7718	8.06334e-07
ko05418	Fluid shear stress and atherosclerosis	114	4929	138	7718	8.73169e-07
ko05140	Leishmaniasis	65	4929	73	7718	9.83817e-07
ko04014	Ras signaling pathway	181	4929	231	7718	9.88567e-07
ko04064	NF-kappa B signaling pathway	79	4929	92	7718	2.03273e-06
ko03040	Spliceosome	104	4929	126	7718	2.86591e-06
ko04612	Antigen processing and presentation	65	4929	74	7718	3.03938e-06
ko05206	MicroRNAs in cancer	114	4929	140	7718	3.64194e-06
ko04933	AGE-RAGE signaling pathway in diabetic complications	83	4929	98	7718	3.74742e-06
ko04110	Cell cycle	100	4929	121	7718	3.97342e-06
ko04668	TNF signaling pathway	96	4929	116	7718	5.50517e-06
ko04658	Th1 and Th2 cell differentiation	79	4929	94	7718	1.18942e-05
ko04921	Oxytocin signaling pathway	117	4929	146	7718	1.22067e-05
ko04142	Lysosome	98	4929	120	7718	1.38257e-05
ko04062	Chemokine signaling pathway	144	4929	184	7718	1.43419e-05
ko05163	Human cytomegalovirus infection	175	4929	228	7718	1.52749e-05
ko05132	Salmonella infection	69	4929	81	7718	1.66119e-05
ko00010	Glycolysis / Gluconeogenesis	53	4929	60	7718	1.7874e-05
ko05321	Inflammatory bowel disease (IBD)	58	4929	67	7718	2.87576e-05
ko04137	Mitophagy - animal	57	4929	66	7718	3.93228e-05
ko04640	Hematopoietic cell lineage	83	4929	101	7718	4.03301e-05
ko05219	Bladder cancer	36	4929	39	7718	4.70459e-05
ko04141	Protein processing in endoplasmic reticulum	126	4929	161	7718	4.9022e-05
ko05170	Human immunodeficiency virus 1 infection	164	4929	215	7718	5.16994e-05
ko04150	mTOR signaling pathway	118	4929	150	7718	5.56798e-05
ko04722	Neurotrophin signaling pathway	95	4929	118	7718	5.69899e-05
ko04919	Thyroid hormone signaling pathway	89	4929	110	7718	6.8456e-05
ko04066	HIF-1 signaling pathway	78	4929	95	7718	7.31612e-05
ko00562	Inositol phosphate metabolism	61	4929	72	7718	7.33684e-05
ko04310	Wnt signaling pathway	121	4929	155	7718	8.46515e-05
ko04514	Cell adhesion molecules (CAMs)	116	4929	148	7718	8.62759e-05
ko04916	Melanogenesis	80	4929	98	7718	8.8075e-05
ko05202	Transcriptional misregulation in cancer	140	4929	182	7718	8.94001e-05
ko04934	Cushing syndrome	120	4929	154	7718	0.000104683
ko04611	Platelet activation	95	4929	119	7718	0.000105904
ko04261	Adrenergic signaling in cardiomyocytes	109	4929	139	7718	0.000135224
ko05169	Epstein-Barr virus infection	161	4929	213	7718	0.000138949
ko04657	IL-17 signaling pathway	70	4929	85	7718	0.000142417
ko04931	Insulin resistance	86	4929	107	7718	0.000142897
ko05100	Bacterial invasion of epithelial cells	61	4929	73	7718	0.000168528
ko04912	GnRH signaling pathway	72	4929	88	7718	0.000172416
ko05230	Central carbon metabolism in cancer	52	4929	61	7718	0.000181602
ko04360	Axon guidance	134	4929	175	7718	0.000182762
ko04666	Fc gamma R-mediated phagocytosis	69	4929	84	7718	0.000185612
ko05231	Choline metabolism in cancer	77	4929	95	7718	0.000188677
ko04530	Tight junction	131	4929	171	7718	0.000207278
ko04928	Parathyroid hormone synthesis, secretion and action	84	4929	105	7718	0.000230948
ko04922	Glucagon signaling pathway	76	4929	94	7718	0.000242138
ko04140	Autophagy - animal	101	4929	129	7718	0.000263637
ko04114	Oocyte meiosis	88	4929	111	7718	0.000298191
ko03015	mRNA surveillance pathway	67	4929	82	7718	0.000313025
ko04810	Regulation of actin cytoskeleton	154	4929	205	7718	0.000322892
ko01040	Biosynthesis of unsaturated fatty acids	27	4929	29	7718	0.000325323
ko04926	Relaxin signaling pathway	100	4929	128	7718	0.000327084
ko04120	Ubiquitin mediated proteolysis	107	4929	138	7718	0.000347389
ko04071	Sphingolipid signaling pathway	92	4929	117	7718	0.000373605
ko05145	Toxoplasmosis	87	4929	110	7718	0.000374552
ko05133	Pertussis	60	4929	73	7718	0.000473295
ko04022	cGMP-PKG signaling pathway	122	4929	160	7718	0.000476224
ko04520	Adherens junction	57	4929	69	7718	0.000506936
ko04670	Leukocyte transendothelial migration	88	4929	112	7718	0.00052299
ko05020	Prion diseases	29	4929	32	7718	0.000618523
ko04072	Phospholipase D signaling pathway	111	4929	145	7718	0.000652784
ko04966	Collecting duct acid secretion	25	4929	27	7718	0.000698484
ko05221	Acute myeloid leukemia	53	4929	64	7718	0.000708693
ko04927	Cortisol synthesis and secretion	53	4929	64	7718	0.000708693
ko04660	T cell receptor signaling pathway	79	4929	100	7718	0.0007374
ko04728	Dopaminergic synapse	98	4929	127	7718	0.0008228
ko00565	Ether lipid metabolism	41	4929	48	7718	0.000824553
ko04151	PI3K-Akt signaling pathway	251	4929	350	7718	0.000902447
ko01522	Endocrine resistance	73	4929	92	7718	0.000921944
ko04380	Osteoclast differentiation	95	4929	123	7718	0.000932002
ko00071	Fatty acid degradation	34	4929	39	7718	0.00108589
ko04721	Synaptic vesicle cycle	62	4929	77	7718	0.00110572
ko05416	Viral myocarditis	54	4929	66	7718	0.0011253
ko04910	Insulin signaling pathway	101	4929	132	7718	0.00116126
ko04925	Aldosterone synthesis and secretion	74	4929	94	7718	0.00129663
ko04270	Vascular smooth muscle contraction	100	4929	131	7718	0.00140969
ko04750	Inflammatory mediator regulation of TRP channels	76	4929	97	7718	0.00143806
ko00270	Cysteine and methionine metabolism	39	4929	46	7718	0.00150209
ko00230	Purine metabolism	99	4929	130	7718	0.00170758
ko04020	Calcium signaling pathway	135	4929	182	7718	0.00177884
ko00630	Glyoxylate and dicarboxylate metabolism	26	4929	29	7718	0.001794
ko00062	Fatty acid elongation	26	4929	29	7718	0.001794
ko05220	Chronic myeloid leukemia	60	4929	75	7718	0.00179698
ko04550	Signaling pathways regulating pluripotency of stem cells	101	4929	133	7718	0.0018136
ko04940	Type I diabetes mellitus	44	4929	53	7718	0.00182851
ko00051	Fructose and mannose metabolism	29	4929	33	7718	0.00197664
ko00410	beta-Alanine metabolism	29	4929	33	7718	0.00197664
ko04971	Gastric acid secretion	57	4929	71	7718	0.00199403
ko00620	Pyruvate metabolism	32	4929	37	7718	0.00205813
ko04672	Intestinal immune network for IgA production	43	4929	52	7718	0.00240661
ko05211	Renal cell carcinoma	56	4929	70	7718	0.00254002
ko04914	Progesterone-mediated oocyte maturation	68	4929	87	7718	0.00283011
ko00564	Glycerophospholipid metabolism	75	4929	97	7718	0.00297927
ko05165	Human papillomavirus infection	231	4929	325	7718	0.00303365
ko04915	Estrogen signaling pathway	98	4929	130	7718	0.00315513
ko04625	C-type lectin receptor signaling pathway	77	4929	100	7718	0.00322025
ko05215	Prostate cancer	72	4929	93	7718	0.00337967
ko04152	AMPK signaling pathway	90	4929	119	7718	0.00388902
ko04390	Hippo signaling pathway	110	4929	148	7718	0.00409436
ko00260	Glycine, serine and threonine metabolism	35	4929	42	7718	0.00478107
ko04216	Ferroptosis	35	4929	42	7718	0.00478107
ko05144	Malaria	43	4929	53	7718	0.00489248
ko03013	RNA transport	111	4929	150	7718	0.00500293
ko03018	RNA degradation	58	4929	74	7718	0.00508062
ko00640	Propanoate metabolism	26	4929	30	7718	0.005253
ko04662	B cell receptor signaling pathway	55	4929	70	7718	0.00573854
ko04371	Apelin signaling pathway	99	4929	133	7718	0.00583373
ko03320	PPAR signaling pathway	57	4929	73	7718	0.00632963
ko04012	ErbB signaling pathway	64	4929	83	7718	0.00659855
ko05161	Hepatitis B	120	4929	164	7718	0.00676091
ko04510	Focal adhesion	137	4929	189	7718	0.00691078
ko00280	Valine, leucine and isoleucine degradation	39	4929	48	7718	0.00696591
ko04130	SNARE interactions in vesicular transport	28	4929	33	7718	0.00707021
ko05332	Graft-versus-host disease	36	4929	44	7718	0.00764915
ko00510	N-Glycan biosynthesis	41	4929	51	7718	0.0080967
ko03460	Fanconi anemia pathway	41	4929	51	7718	0.0080967
ko04213	Longevity regulating pathway - multiple species	46	4929	58	7718	0.008218
ko05162	Measles	103	4929	140	7718	0.00894717
ko05216	Thyroid cancer	30	4929	36	7718	0.0089786
ko00330	Arginine and proline metabolism	38	4929	47	7718	0.0089981
ko04068	FoxO signaling pathway	94	4929	127	7718	0.00929138
ko05224	Breast cancer	107	4929	146	7718	0.00944609
ko04961	Endocrine and other factor-regulated calcium reabsorption	35	4929	43	7718	0.00995033
ko04210	Apoptosis	102	4929	139	7718	0.0104711
ko05167	Kaposi sarcoma-associated herpesvirus infection	138	4929	192	7718	0.0108045
ko04211	Longevity regulating pathway	66	4929	87	7718	0.0111924
ko04962	Vasopressin-regulated water reabsorption	37	4929	46	7718	0.0115745
ko03030	DNA replication	29	4929	35	7718	0.0118942
ko05031	Amphetamine addiction	49	4929	63	7718	0.0126003
ko00020	Citrate cycle (TCA cycle)	26	4929	31	7718	0.0127712
ko05212	Pancreatic cancer	56	4929	73	7718	0.0128998
ko04370	VEGF signaling pathway	44	4929	56	7718	0.0130349
ko00100	Steroid biosynthesis	17	4929	19	7718	0.0131784
ko04540	Gap junction	65	4929	86	7718	0.0135209
ko04115	p53 signaling pathway	58	4929	76	7718	0.0137825
ko05226	Gastric cancer	108	4929	149	7718	0.0154493
ko04720	Long-term potentiation	48	4929	62	7718	0.0156135
ko05414	Dilated cardiomyopathy (DCM)	64	4929	85	7718	0.0162817
ko04710	Circadian rhythm	25	4929	30	7718	0.0170393
ko04730	Long-term depression	45	4929	58	7718	0.0178202
ko00250	Alanine, aspartate and glutamate metabolism	30	4929	37	7718	0.0185429
ko04970	Salivary secretion	61	4929	81	7718	0.0186497
ko00670	One carbon pool by folate	16	4929	18	7718	0.0186886
ko05142	Chagas disease (American trypanosomiasis)	83	4929	113	7718	0.0190649
ko04911	Insulin secretion	63	4929	84	7718	0.0195424
ko05152	Tuberculosis	129	4929	181	7718	0.0203736
ko05210	Colorectal cancer	65	4929	87	7718	0.0204003
ko05030	Cocaine addiction	37	4929	47	7718	0.0211072
ko05218	Melanoma	53	4929	70	7718	0.0232969
ko04744	Phototransduction	21	4929	25	7718	0.0245153
ko00900	Terpenoid backbone biosynthesis	18	4929	21	7718	0.025966
ko00514	Other types of O-glycan biosynthesis	18	4929	21	7718	0.025966
ko00910	Nitrogen metabolism	15	4929	17	7718	0.0263634
ko00600	Sphingolipid metabolism	36	4929	46	7718	0.0265214
ko05410	Hypertrophic cardiomyopathy (HCM)	59	4929	79	7718	0.0268116
ko04924	Renin secretion	52	4929	69	7718	0.0281607
ko00520	Amino sugar and nucleotide sugar metabolism	38	4929	49	7718	0.0289297
ko05164	Influenza A	120	4929	169	7718	0.0290778
ko04350	TGF-beta signaling pathway	65	4929	88	7718	0.029836
ko05217	Basal cell carcinoma	47	4929	62	7718	0.0307348
ko05146	Amoebiasis	69	4929	94	7718	0.0316
ko04610	Complement and coagulation cascades	58	4929	78	7718	0.0319785
ko04923	Regulation of lipolysis in adipocytes	42	4929	55	7718	0.0333467
ko04920	Adipocytokine signaling pathway	51	4929	68	7718	0.0339083
ko05412	Arrhythmogenic right ventricular cardiomyopathy (ARVC)	51	4929	68	7718	0.0339083
ko05330	Allograft rejection	37	4929	48	7718	0.0358629
ko05032	Morphine addiction	66	4929	90	7718	0.0361541
ko04621	NOD-like receptor signaling pathway	118	4929	167	7718	0.0371747
ko05225	Hepatocellular carcinoma	120	4929	170	7718	0.0373359
ko00480	Glutathione metabolism	41	4929	54	7718	0.0407317
ko00970	Aminoacyl-tRNA biosynthesis	34	4929	44	7718	0.0412619
ko00515	Mannose type O-glycan biosynthesis	19	4929	23	7718	0.0436833
ko04979	Cholesterol metabolism	36	4929	47	7718	0.0442405
ko04024	cAMP signaling pathway	146	4929	210	7718	0.0473581
ko05134	Legionellosis	40	4929	53	7718	0.0495215
