# Supplementary material for: Identification and Bioinformatics Analysis of Differentially Expressed Milk Exosomal Micrornas in Milk Exosomes of Heat-Stressed Holstein Cows
Source: Research Square preprint supplement (doi:10.21203/rs.3.rs-593653/v1), 2021-06-16
Supplement: Supplementary file 2 [file e6b48f59639793b1f18e364d.docx]

Table S1. The primer sequences for real-time PCR.

| MiRNAs | Reverse primer sequence | PCR Primer Sequences (5’-3’)* |
| --- | --- | --- |
| bta-miR-30b-5p | GTCGTATCCAGTGCAGGGTCCGAGGTATTCGCACTGGATACGACGGCTCC | F:GCGCGCGCCCGCCCCA |
| bta-miR-141_R-1 | GTCGTATCCAGTGCAGGGTCCGAGGTATTCGCACTGGATACGACCTCTTT | F:GCGCGCGAACACGCGG |
| bta-miR-339a_R-2 | GTCGTATCCAGTGCAGGGTCCGAGGTATTCGCACTGGATACGACGGCTCC | F:GCGCGCGCCCGCCCCA |
| bta-miR-339b | GTCGTATCCAGTGCAGGGTCCGAGGTATTCGCACTGGATACGACGGCTCC | F:GCGCGCGCCCGCCCCA |
| chi-miR-340-5p | GTCGTATCCAGTGCAGGGTCCGAGGTATTCGCACTGGATACGACTCGTCT | F:GCGCGCGAAAAGCAAG |
| bta-miR-20a | GTCGTATCCAGTGCAGGGTCCGAGGTATTCGCACTGGATACGACCTCCTG | F:CGCGCGAAAGGCAAGG |
| bta-miR-30f_R-3 | GTCGTATCCAGTGCAGGGTCCGAGGTATTCGCACTGGATACGACTGGGTG | F:CGCGCGGAAACACCCA |
| bta-miR-27a-3p | GTCGTATCCAGTGCAGGGTCCGAGGTATTCGCACTGGATACGACCGGCTT | F:CGCGCGCGCACAGGGC |
| bta-miR-193a-5p | GTCGTATCCAGTGCAGGGTCCGAGGTATTCGCACTGGATACGACTCTCTC | F:CGCGCGGGGCGCGGGC |
| U6 | AACGCTTCACGAATTTGCGT | F:CTCGCTTCGGCAGCACA |

*means the primer sequences of downstream PCR were unified as AGTGCAGGGTCCGAGGTATT.
